# Supplementary material for: Seizure-Induced Regulations of Amyloid-β, STEP61, and STEP61Substrates Involved in Hippocampal Synaptic Plasticity
Source: Hindawi journal article supplement (doi:10.1155/2016/2123748), 2016-01-01

# Supplemental Figure 1

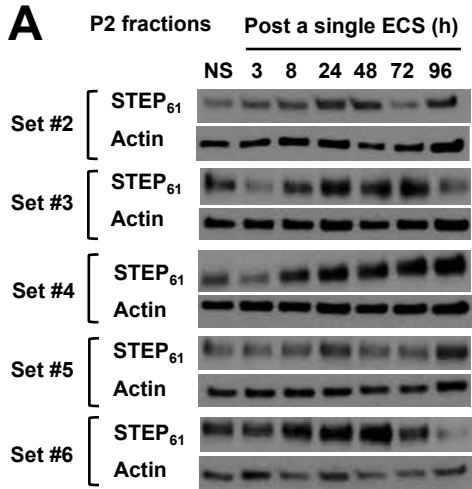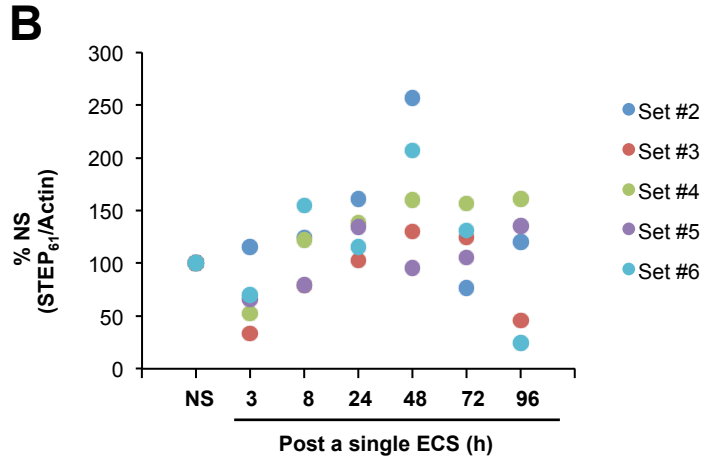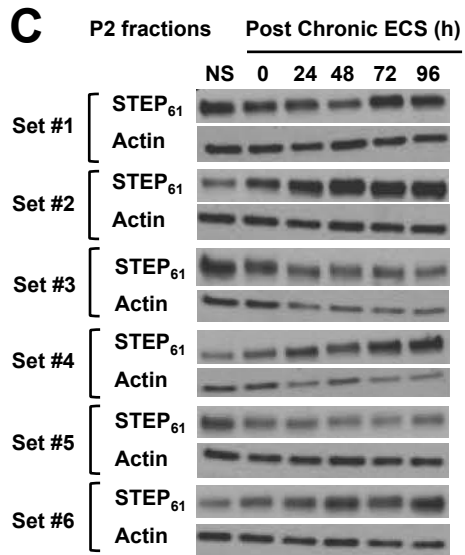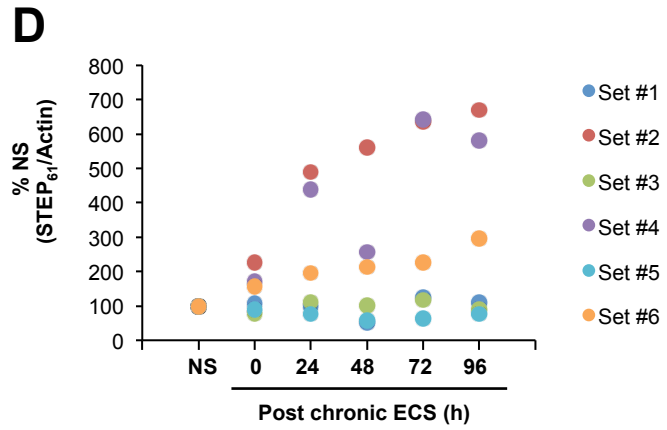

## Supplemental Figure 2

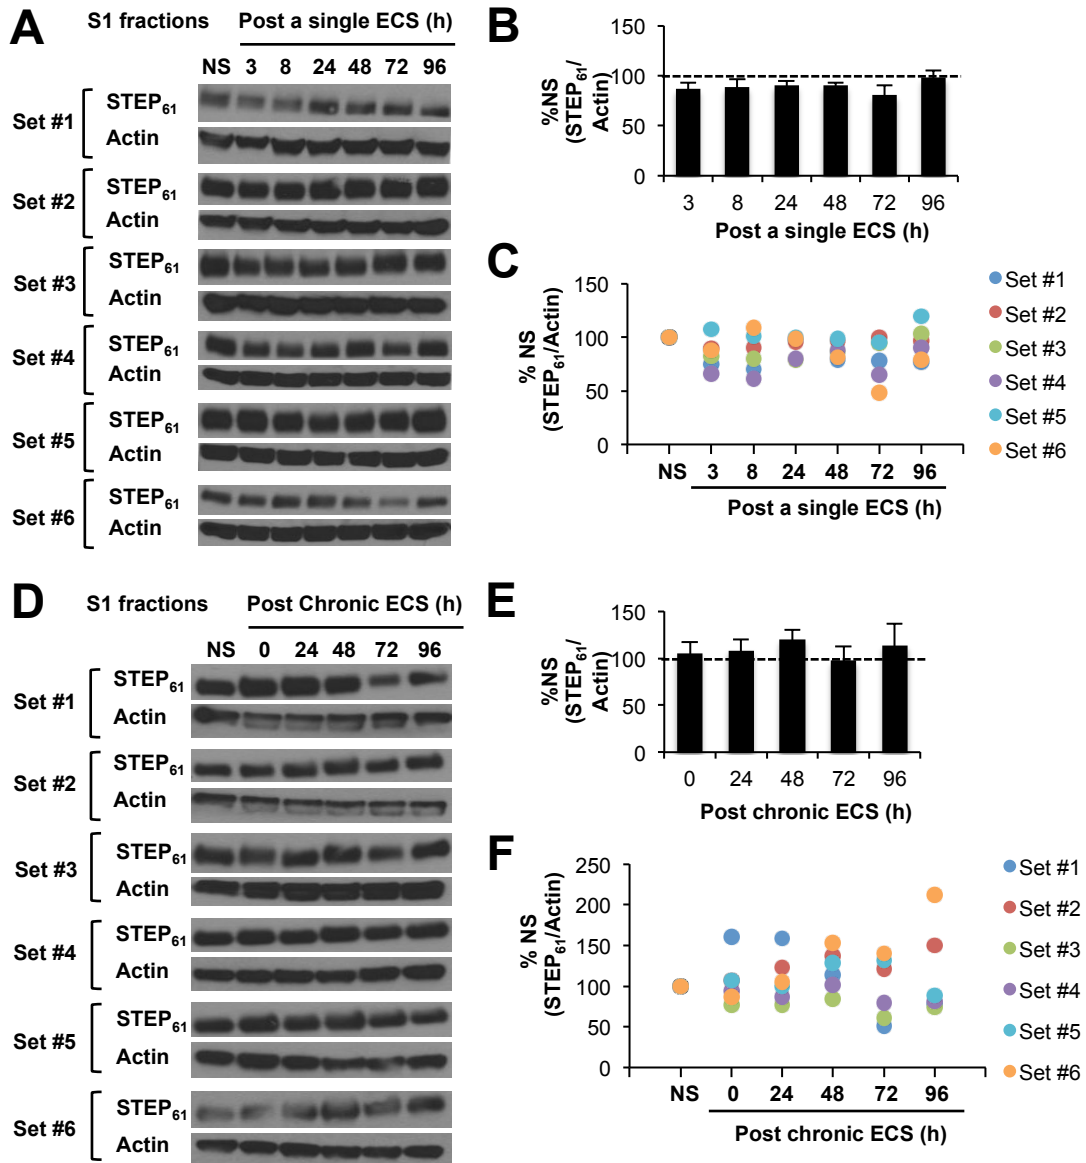

# Supplemental Figure 3

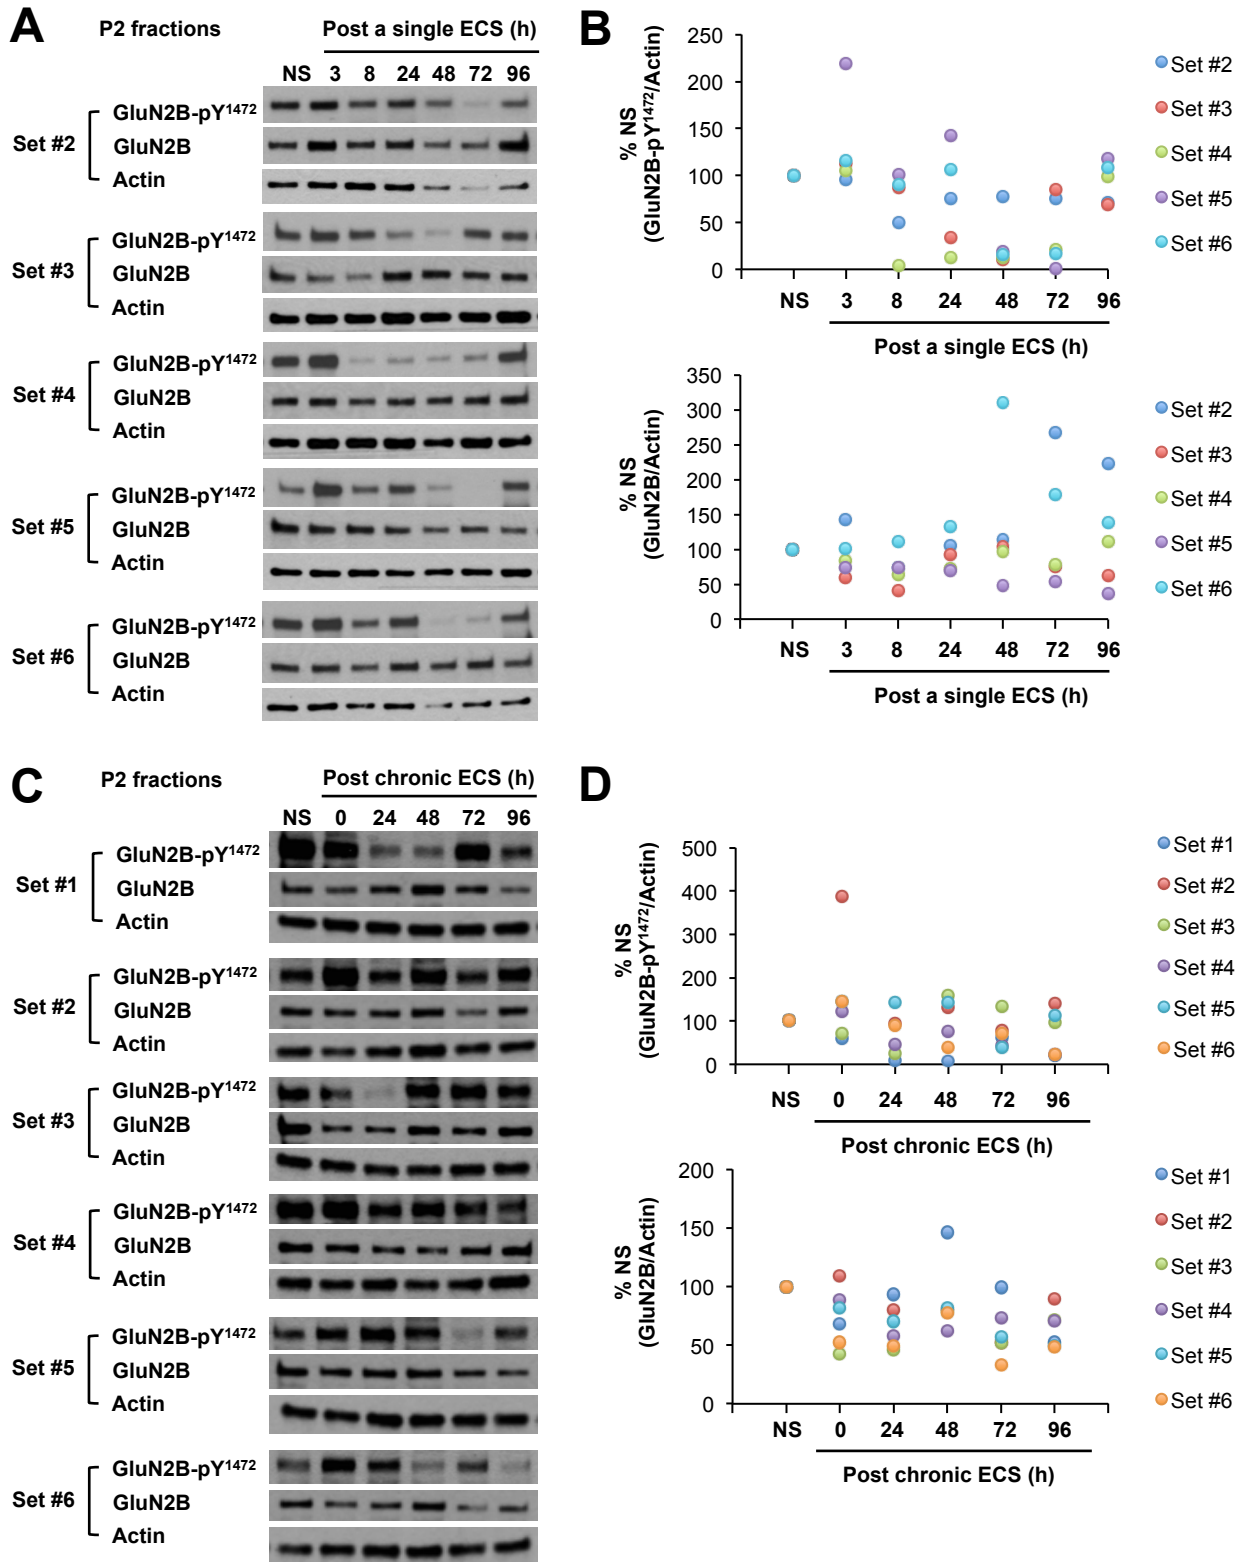

# Supplemental Figure 4

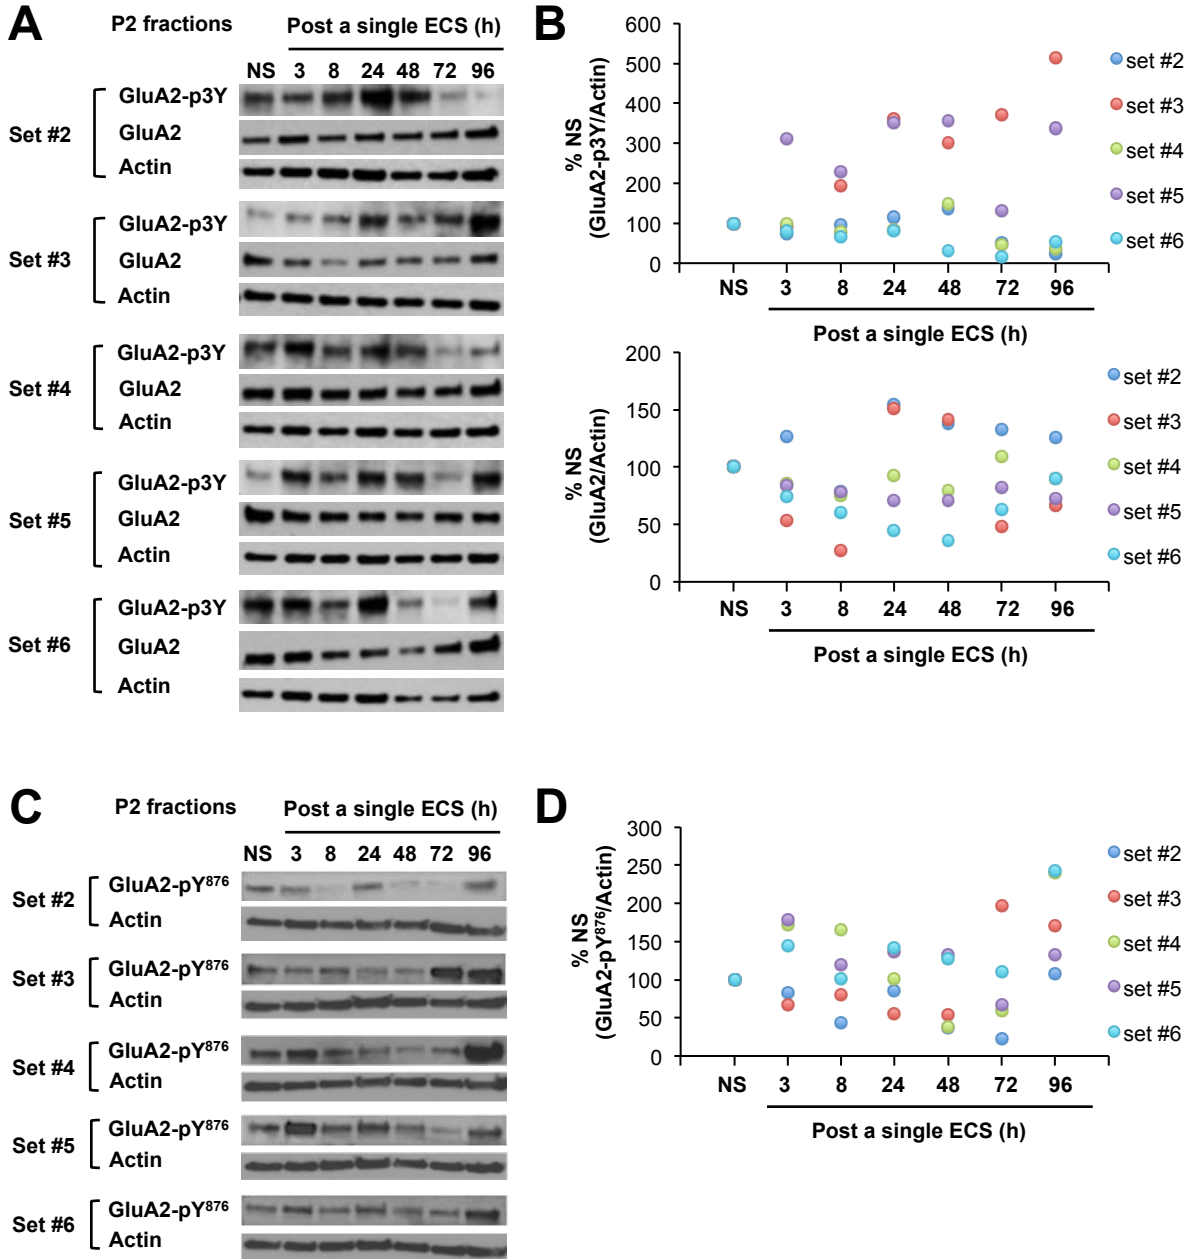

# Supplemental Figure 5

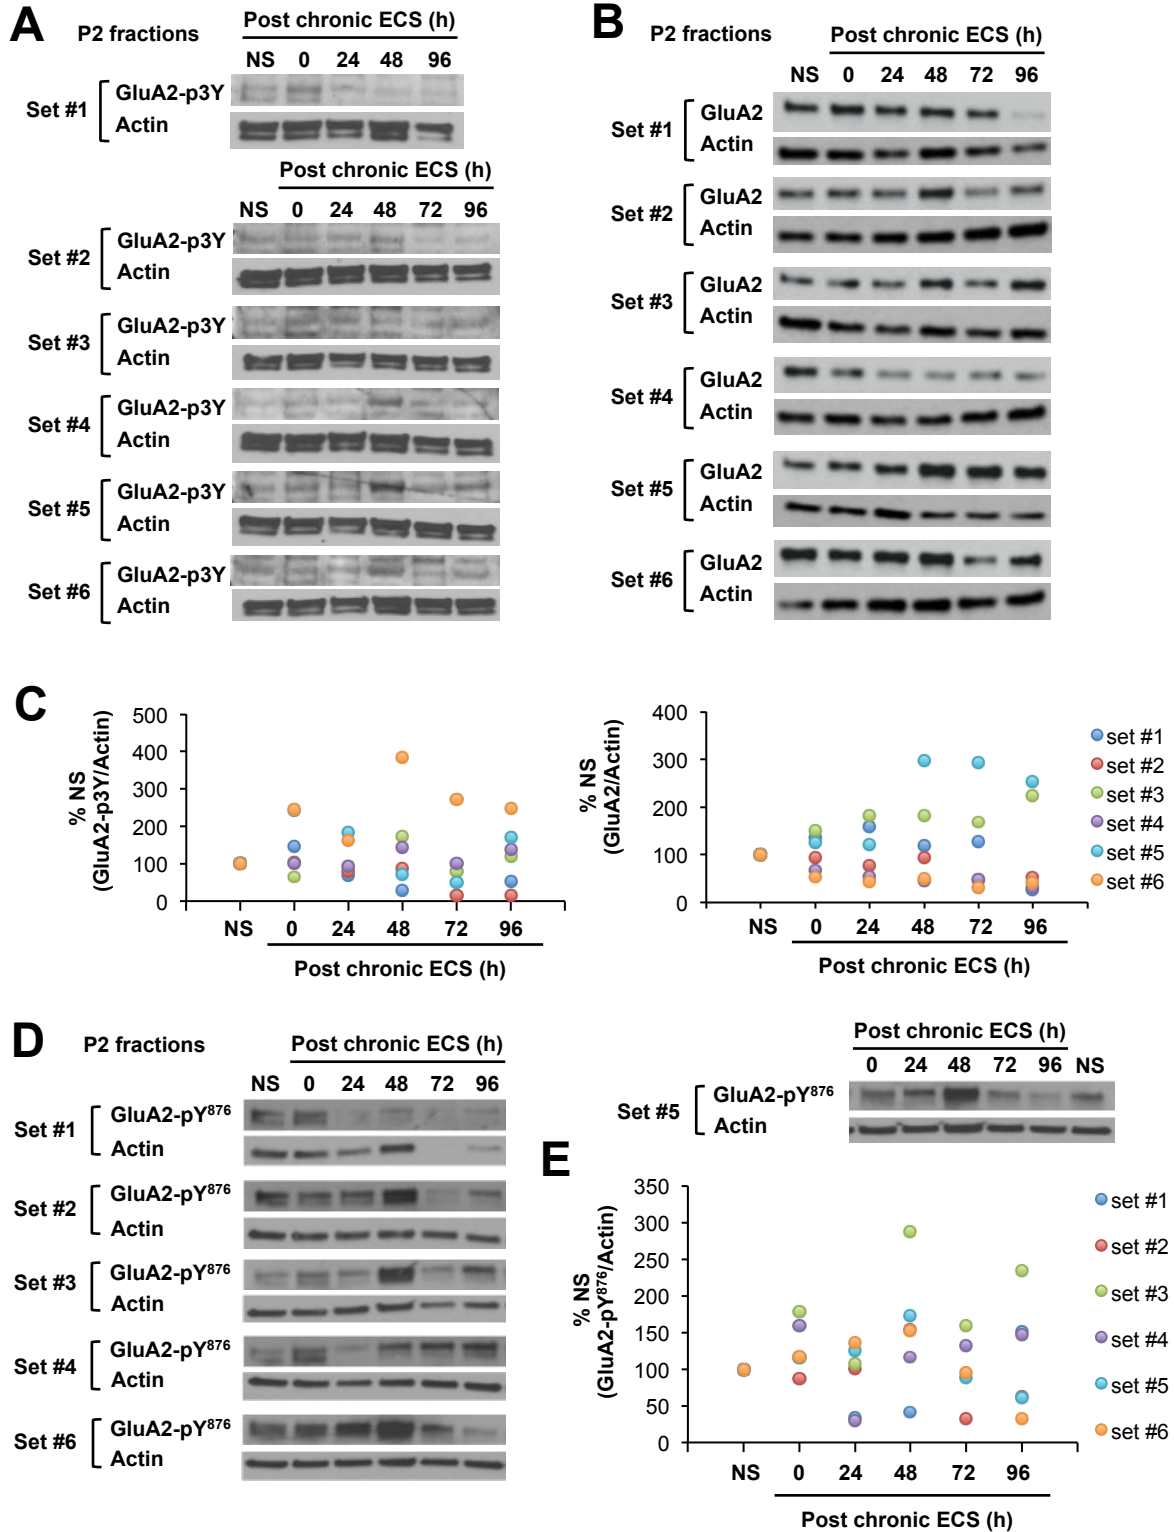

# Supplemental Figure 6

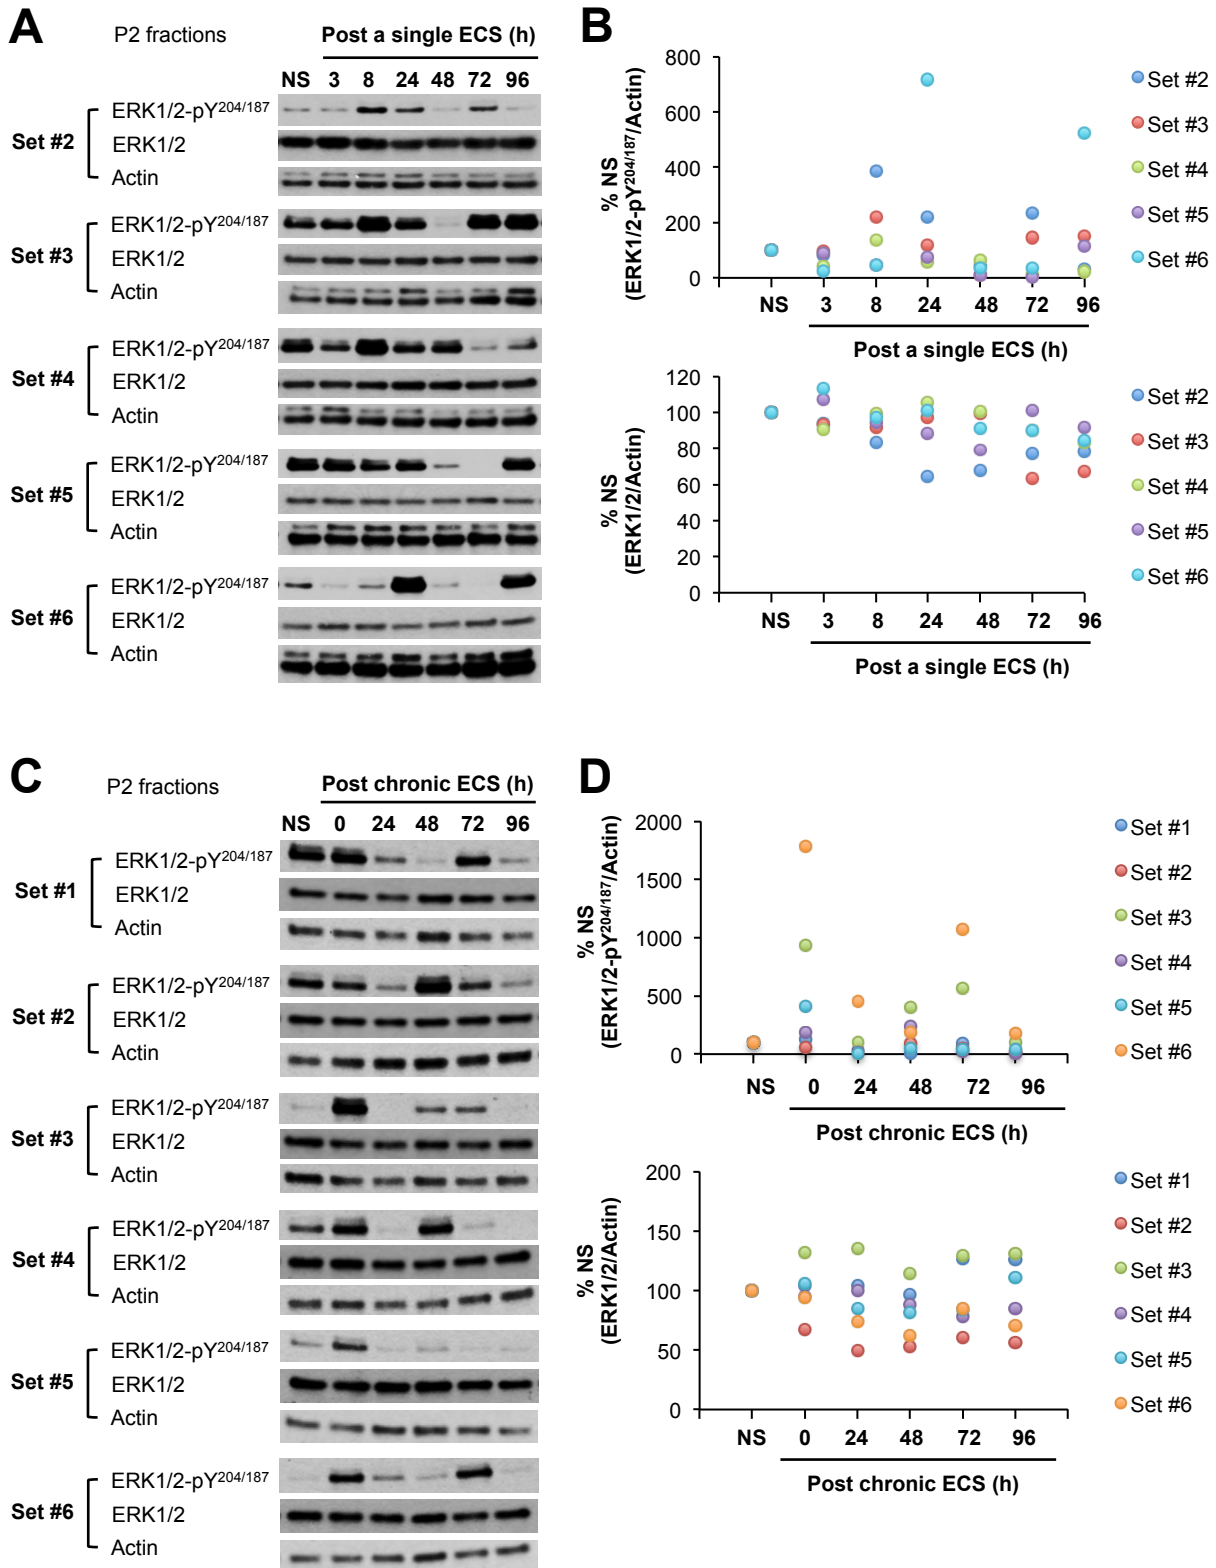

# Supplemental Figure 7

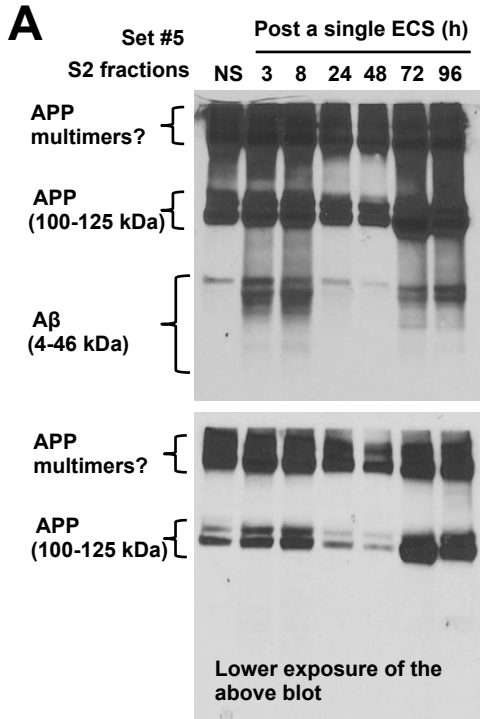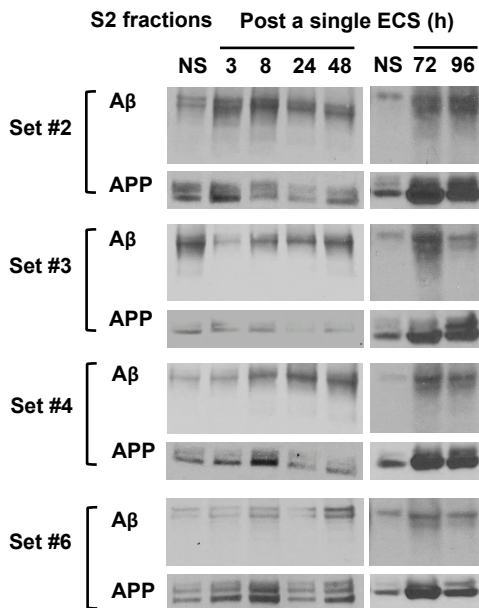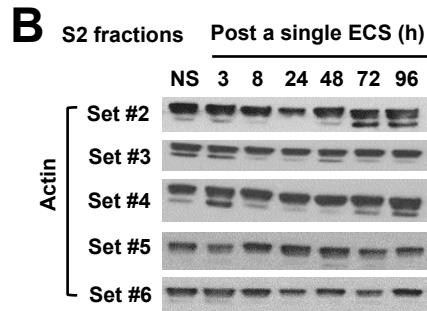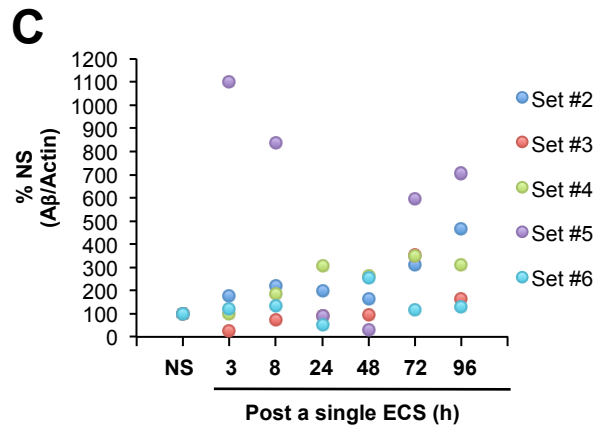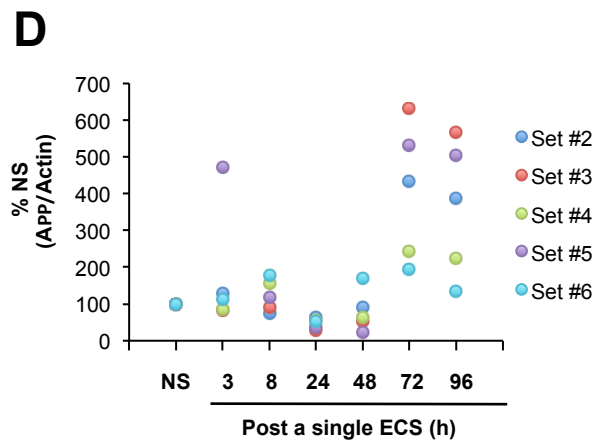

# Supplemental Figure 8

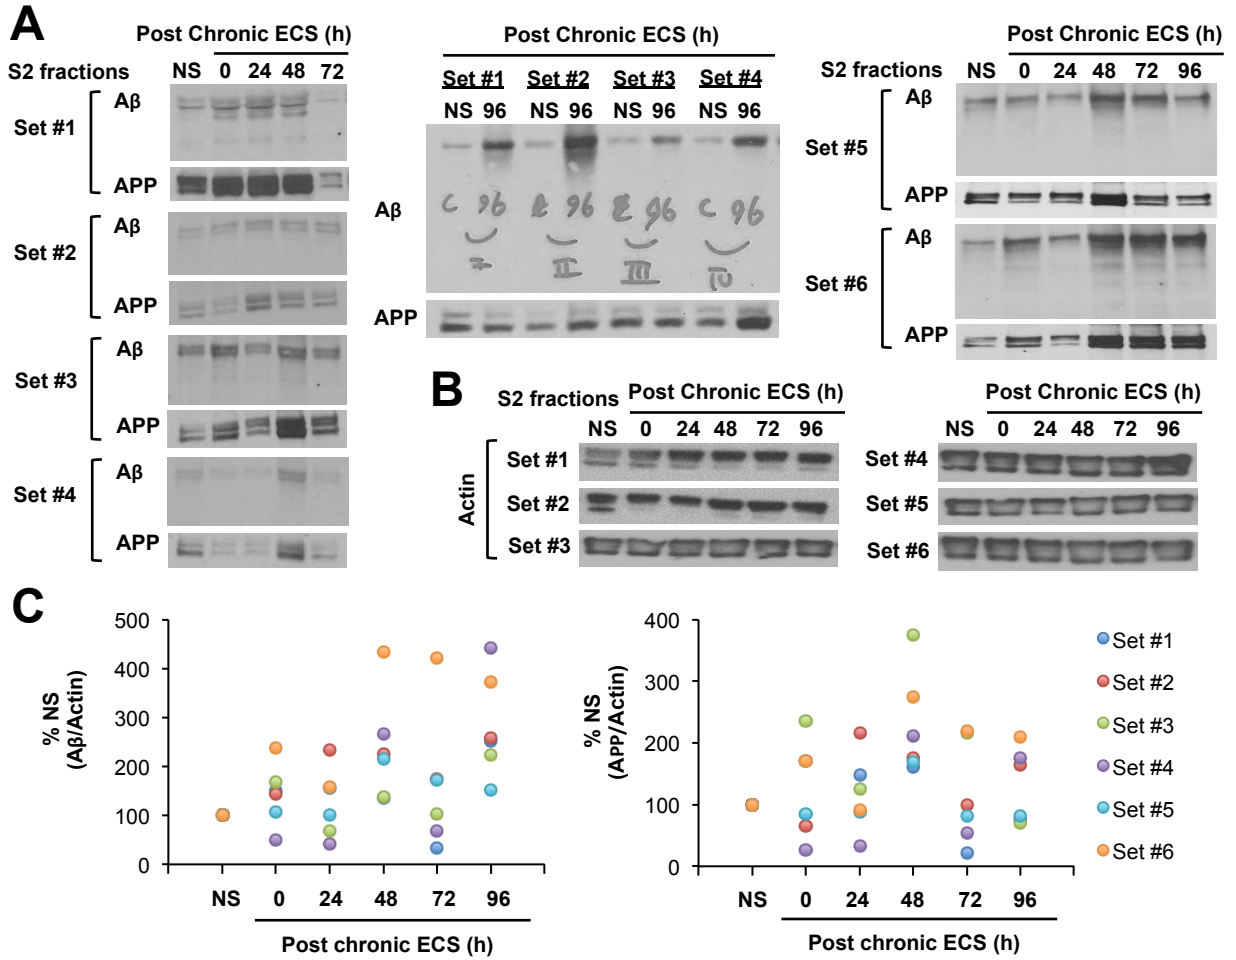

Supplement: f1 [file 2123748.f1.pdf]
